# Supplementary material for: Extravascular leakage of dexrazoxane during treatment of diffuse large B-cell lymphoma: A case report
Source: Research Square preprint supplement (doi:10.21203/rs.3.rs-5987269/v1), 2025-02-13
Supplement: Supplementary file 1 [file 6e4f1f0c5cb21519e18143b5.xlsx]

## Sheet: Table1
Table1. Review of the literature regarding reports that focus on the extravascular leakage of anthracyclines
Case	Age	Sex	Cancer Type	Leaking agent	Leakage site	Dexrazoxane administration	Intravenous steroid	Topical steroid	Necrotic tissues	Treatment	Leackage of Dexrazoxane	Outcome of current disease	Reference
1-i	47	F	breast cancer	epirubicin	forearm	-	-	-	Yes	Skin graft	-	-	20
1-ii	66	F	breast cancer	epirubicin	Cubital fossa	-	-	-	Yes	Brachioradialis fap	-	-
1-iii	49	F	breast cancer	epirubicin	forearm	-	-	-	Yes	Skin graft	-	-
1-iv	78	F	breast cancer	epirubicin	Dorsum of the hand	-	-	-	Yes	Radial forearm fap	-	-
1-v	45	F	breast cancer	epirubicin	Pectoral region	-	-	-	Yes	Latissimus dorsi fap	-	-
1-vi	65	M	B-cell lymphoma	doxorubicin	forearm	-	-	-	Yes	Skin graft	-	-
2	38	F	breast cancer	epirubicin	left forearm	-	Yes	Yes (details unknown)	Yes	Skin graft	-	-	21
3	70	F	malignant lymphoma	Mitoxantrone	left forearm	Yes	Yes	Clobetasol	None	-	-	-	22
4	-	-	esophageal adenocarcinoma	epirubicin	right forearm	Yes(cardioxa)	-	-	None	-	-	90 days of follow-up	23
5	42	F	breast cancer	doxorubicin	Infusion Port	Yes	-	-	None	-	-	Evaluation up to 6 months, postoperative outcomes are described.	24
6-i	50	F	follicular lymphoma	doxorubicin	right forearm	Yes	-	Betamethasone	None		-	Treatment completed, CR maintained (1 year and 4 months later)	25
6-ii	51	F	uterine cancer	doxorubicin	left forearm	Yes	-	-	None	-	-	Treatment completed, CR maintained (1 year and 6 months later)
6-iii	51	F	uterine cancer	doxorubicin	right forearm	Yes	-	-	None		-	Treatment completed, CR maintained (1 year and 6 months later)
7-i	76	M	Follicular lymphomas	doxorubicin	left forearm	Yes	-	Clobetasol	None	-	-	Treatment completed (8 courses)	26
7-ii	59	F	DLBCL	doxorubicin	left forearm	Yes	-	Clobetasol →Betamethasone、Acrinol	None		-	Treatment completed (8 courses)
7-iii	64	M	Extensive small cell lung cancer	amrubicin	left forearm	Yes	-	Clobetasol	None		-	CV port implanted and treatment continued
7-iv	78	M	invasive thymoma	amrubicin	left forearm	Yes	-	Clobetasol	None		-	-
8	Unknown (30s)	F	AML	Daunorubicin/cytarabine	Left chest wall port	Yes	-	-	None	Dimethyl sulfoxide Vancomycin	-	Death	27
9	55	M	DLBCL	doxorubicin	left forearm	Yes	-	Clobetasol	None	-	Yes	Treatment completed, CR maintained (6 years)	Our Case
